# Supplementary material for: Deciphering the Multi-Chromosomal Mitochondrial Genome of Populus simonii
Source: Front Plant Sci. 2022 Jun 15;13:914635. doi: 10.3389/fpls.2022.914635 (PMC9240471; doi:10.3389/fpls.2022.914635)
Supplement: Supplementary file 3 [file Table_1.XLSX]

## Sheet: Table S1
Table S1. Abbreviations and GenBank accession numbers of plant mitogenomes sampled in this study
Latin Name	Abbreviation	NC accessions	Size (kb)	GC cotent (%)
Anthoceros angustus	A. angustus	NC_037476.1	242410	45.7663
Arabidopsis thaliana	A. thaliana	NC_037304.1	367808	44.7921
Brassica napus	B. napus	NC_008285.1	221853	45.1858
Butomus umbellatus	B. umbellatus	NC_021399.1	450826	49.0999
Camellia sinensis	C. sinensis	NC_043914.1	707441	45.7534
Cannabis sativa	C. sativa	NC_029855.1	415602	45.5741
Capsicum annuum	C. annuum	NC_024624.1	511530	44.5247
Carica papaya	C. papaya	NC_012116.1	476890	45.1171
Chenopodium quinoa	C. quinoa	NC_041093.1	315003	43.8288
Citrullus lanatus	C. lanatus	NC_014043.1	379236	45.08
Cycas taitungensis	C.taitungensis	NC_010303.1	414903	46.9189
Daucus carota	D. carota	NC_017855.1	281132	45.4185
Eucalyptus grandis	E. grandis	NC_040010.1	478813	44.8334
Ginkgo biloba	G. biloba	NC_027976.1	346544	50.3581
Glycine max	G. max	NC_020455.1	402558	45.03
Gossypium arboreum	G. arboreum	NC_035073.1	687482	44.9444
Helianthus annuus	H. annuus	NC_023337.1	300945	45.05
Huperzia squarrosa	H. squarrosa	NC_017755.1	413530	44.16
Lactuca sativa	L. sativa	NC_042756.1	363324	45.3548
Luffa acutangula	L. acutangula	NC_050067.1	460333	43.8735
Malus domestica	M. domestica	NC_018554.1	396947	45.4
Manihot esculenta	M. esculenta	NC_045136.1	682840	44.4697
Marchantia polymorpha	M. polymorpha	NC_037508.1	186196	42.6287
Nelumbo nucifera	N. nucifera	NC_030753.1	524797	48.1554
Nicotiana tabacum	N. tabacum	NC_006581.1	430597	44.9587
Nymphaea colorata	N. colorata	NC_037468.1	617195	45.1101
Ophioglossum californicum	O. californicum	NC_030900.1	372339	52.218
Oryza sativa Japonica	O. sativa	NC_011033.1	490520	43.8526
Passiflora edulis	P. edulis	NC_050950.1	680480	44.65
Phaeoceros laevis	P. laevis	NC_013765.1	209482	44.6043
Phaseolus vulgaris	P. vulgaris	NC_045135.1	395516	45.11
Phoenix dactylifera	P. dactylifera	NC_016740.1	715001	45.1441
Physcomitrella patens	P. patens	NC_007945.1	105340	40.57
Pinus taeda	P. taeda	NC_039746.1	1191054	46.6729
Populus alba	P. alba	NC_041085.1	838420	44.82
Populus davidiana	P. davidiana	NC_035157.1	779361	44.82
Populus simonii	P. simonii	MZ905370-MZ905372	781478	44.78
Populus tremula	P. tremula	NC_028096.1	783442	44.75
Ricinus communis	R. communis	NC_015141.1	502773	44.98
Salix brachista	S. brachista	NC_058733.1	608983	44.93
Salix purpurea	S. purpurea	NC_029693.1	598970	44.94
Salix suchowensis	S. suchowensis	NC_029317.1	644437	44.98
Salvia miltiorrhiza	S. miltiorrhiza	NC_023209.1	499236	44.3876
Scapania ornithopodioides	S. ornithopodioides	MK230950.1	142992	45.05
Senna tora	S. tora	NC_038053.1	566589	45.2294
Solanum_melongena	S._melongena	NC_035963.1	446257	45.0657
Sophora flavescens	S. flavescens	NC_043897.1	494369	44.86
Sorghum bicolor	S. bicolor	NC_008360.1	468628	43.727
Sphagnum palustre	S. palustre	NC_024521.1	141276	38.9932
Spinacia oleracea	S. oleracea	NC_035618.1	329613	43.4103
Styphnolobium japonicum	S. japonicum	NC_039596.1	484916	45.4458
Tamarindus indica	T. indica	NC_045038.1	607282	45.3643
Triticum aestivum	T. aestivum	NC_036024.1	452526	44.3515
Vitis vinifera	V. vinifera	NC_012119.1	773279	44.1446
Welwitschia mirabilis	W. mirabilis	NC_029130.1	978846	53.021
Ziziphus jujuba	Z. jujuba	NC_029809.1	365190	45.2742
