# Supplementary material for: Deciphering the Multi-Chromosomal Mitochondrial Genome of Populus simonii
Source: Front Plant Sci. 2022 Jun 15;13:914635. doi: 10.3389/fpls.2022.914635 (PMC9240471; doi:10.3389/fpls.2022.914635)
Supplement: Supplementary file 4 [file Table_2.XLSX]

## Sheet: Table S2
Table S2. Summary of PacBio sequencing and Newbler assembly
Statistical list	Number
Number of raw reads (Total)	604419
Total length of raw reads (bp)	7608920719
Average raw read length (bp)	12588.8
Longest read length (bp)	112390
Number of raw reads (> 30kb)	43714
Number of assembled reads after splitting	663890
Average assembled read length after splitting (bp)	11461.1
Number of total assembled contigs	90449
Longest contig (bp)	312303
Number of mitochondrial assembled contigs	14
