# Supplementary material for: Deciphering the Multi-Chromosomal Mitochondrial Genome of Populus simonii
Source: Front Plant Sci. 2022 Jun 15;13:914635. doi: 10.3389/fpls.2022.914635 (PMC9240471; doi:10.3389/fpls.2022.914635)
Supplement: Supplementary file 5 [file Table_3.XLSX]

## Sheet: Table S3
Table S3. Distribution of tandem repeats in the P. simonii mitogenome
No. of break sites	Start	End	No. of PacBio reads	Start	End	Identity (%)	Length (bp)
pt_713_1712	501	1000	SRR9887262.434740	7413	7929	95.938	517
pt_713_1712	501	1000	SRR9887262.657541	9649	9139	95.914	514
pt_713_1712	501	1000	SRR9887262.130232	5099	5605	95.703	512
pt_713_1712	501	1000	SRR9887262.288136	9680	10191	96.875	512
pt_713_1712	501	1000	SRR9887262.353800	3449	2940	96.094	512
pt_713_1712	501	1000	SRR9887262.567086	8817	9324	96.094	512
pt_713_1712	501	1000	SRR9887262.538267	1030	523	95.89	511
pt_713_1712	501	1000	SRR9887262.636501	100	609	96.477	511
pt_713_1712	501	998	SRR9887262.291467	1018	517	95.098	510
pt_713_1712	501	1000	SRR9887262.317413	1740	1232	97.059	510
pt_713_1712	501	1000	SRR9887262.559561	17710	17202	97.059	510
pt_713_1712	501	998	SRR9887262.158336	3805	3302	95.285	509
pt_713_1712	501	1000	SRR9887262.246499	7933	8441	97.446	509
pt_713_1712	501	1000	SRR9887262.641315	5300	4795	95.874	509
pt_713_1712	501	1000	SRR9887262.345090	12963	13470	97.638	508
pt_713_1712	501	1000	SRR9887262.36501	3944	4451	97.638	508
pt_713_1712	501	1000	SRR9887262.408985	8620	9127	97.638	508
pt_713_1712	501	1000	SRR9887262.463428	2273	1767	97.441	508
pt_713_1712	502	1000	SRR9887262.502678	7091	6585	97.244	508
pt_713_1712	501	1000	SRR9887262.516144	124	630	97.441	508
pt_713_1712	501	1000	SRR9887262.601918	5141	5647	97.441	508
pt_713_1712	501	1000	SRR9887262.107864	15147	14641	97.83	507
pt_713_1712	501	1000	SRR9887262.112909	23366	23872	97.83	507
pt_713_1712	501	1000	SRR9887262.113846	3095	3601	97.83	507
pt_713_1712	501	1000	SRR9887262.136646	12669	12163	97.83	507
pt_713_1712	501	1000	SRR9887262.140249	6762	7268	97.83	507
pt_713_1712	501	1000	SRR9887262.152451	9022	8516	97.83	507
pt_713_1712	501	1000	SRR9887262.15516	54724	54218	97.83	507
pt_713_1712	501	1000	SRR9887262.160238	24011	24517	97.83	507
pt_713_1712	501	1000	SRR9887262.170820	13600	14106	97.83	507
pt_713_1712	501	1000	SRR9887262.198985	5514	5008	97.83	507
pt_713_1712	501	1000	SRR9887262.198986	24833	25339	97.83	507
pt_713_1712	501	1000	SRR9887262.202434	4338	4844	97.83	507
pt_713_1712	501	1000	SRR9887262.21261	150	656	97.83	507
pt_713_1712	501	1000	SRR9887262.21762	24991	24485	97.83	507
pt_713_1712	501	1000	SRR9887262.233230	5395	5901	97.83	507
pt_713_1712	501	1000	SRR9887262.234779	16933	17439	97.83	507
pt_713_1712	501	1000	SRR9887262.255346	10209	9703	97.83	507
pt_713_1712	501	1000	SRR9887262.25898	1024	520	97.436	507
pt_713_1712	501	1000	SRR9887262.266218	2282	1777	97.633	507
pt_713_1712	501	1000	SRR9887262.295419	9037	8531	97.83	507
pt_713_1712	501	1000	SRR9887262.296850	12150	12655	97.633	507
pt_713_1712	501	1000	SRR9887262.299312	3166	2660	97.83	507
pt_713_1712	501	1000	SRR9887262.30364	3122	3628	97.83	507
pt_713_1712	501	1000	SRR9887262.312218	12284	11778	97.83	507
pt_713_1712	501	1000	SRR9887262.319438	316	820	97.436	507
pt_713_1712	501	1000	SRR9887262.348321	13804	14310	97.83	507
pt_713_1712	501	1000	SRR9887262.355459	2131	1625	97.83	507
pt_713_1712	501	1000	SRR9887262.360174	5382	5888	97.83	507
pt_713_1712	501	1000	SRR9887262.38360	8274	8780	97.83	507
pt_713_1712	501	1000	SRR9887262.38657	2797	3303	97.83	507
pt_713_1712	501	1000	SRR9887262.402416	1004	1510	97.83	507
pt_713_1712	501	1000	SRR9887262.415762	18844	18338	97.83	507
pt_713_1712	501	1000	SRR9887262.419289	9420	9926	97.83	507
pt_713_1712	501	1000	SRR9887262.420785	18938	18432	97.83	507
pt_713_1712	501	1000	SRR9887262.421048	13728	14234	97.83	507
pt_713_1712	501	1000	SRR9887262.427042	4862	5367	97.633	507
pt_713_1712	501	1000	SRR9887262.433098	653	1158	97.83	507
pt_713_1712	501	1000	SRR9887262.463605	2386	1880	97.633	507
pt_713_1712	501	1000	SRR9887262.466952	34570	34064	97.83	507
pt_713_1712	501	1000	SRR9887262.468965	15161	14655	97.83	507
pt_713_1712	501	1000	SRR9887262.475482	5883	5377	97.83	507
pt_713_1712	501	1000	SRR9887262.495048	12631	12125	97.83	507
pt_713_1712	501	1000	SRR9887262.497245	11772	12278	97.83	507
pt_713_1712	501	1000	SRR9887262.497787	15844	16349	97.633	507
pt_713_1712	501	1000	SRR9887262.497788	1169	663	97.83	507
pt_713_1712	501	1000	SRR9887262.497789	15848	16354	97.83	507
pt_713_1712	501	1000	SRR9887262.497790	1232	726	97.83	507
pt_713_1712	501	1000	SRR9887262.515144	14463	14969	97.83	507
pt_713_1712	501	1000	SRR9887262.529	995	489	97.83	507
pt_713_1712	501	1000	SRR9887262.538138	9995	9490	97.633	507
pt_713_1712	501	1000	SRR9887262.559655	22553	23059	97.83	507
pt_713_1712	501	1000	SRR9887262.581003	7890	7384	97.83	507
pt_713_1712	501	1000	SRR9887262.584890	1026	1532	97.83	507
pt_713_1712	501	1000	SRR9887262.592008	5782	5276	97.83	507
pt_713_1712	501	1000	SRR9887262.598594	5604	5098	97.83	507
pt_713_1712	501	1000	SRR9887262.601570	19211	19717	97.83	507
pt_713_1712	501	1000	SRR9887262.605299	7923	8429	97.83	507
pt_713_1712	501	1000	SRR9887262.616163	9023	8517	97.83	507
pt_713_1712	501	1000	SRR9887262.642695	7963	7460	97.239	507
pt_713_1712	501	1000	SRR9887262.644824	7108	7614	97.83	507
pt_713_1712	501	1000	SRR9887262.650179	9469	9975	97.83	507
pt_713_1712	501	1000	SRR9887262.663958	21556	22062	97.83	507
pt_713_1712	501	1000	SRR9887262.68283	11541	11035	97.83	507
pt_713_1712	501	1000	SRR9887262.78433	19302	18796	97.83	507
pt_713_1712	501	1000	SRR9887262.93155	6467	6973	97.83	507
pt_713_1712	501	1000	SRR9887262.94059	6941	7446	97.83	507
pt_713_1712	501	1000	SRR9887262.9821	16673	17179	97.83	507
pt_713_1712	501	1000	SRR9887262.434741	1741	1239	97.431	506
pt_713_1712	501	998	SRR9887262.354795	4759	5256	96.436	505
pt_713_1712	501	1000	SRR9887262.457699	4469	3968	97.426	505
pt_713_1712	547	1000	SRR9887262.359773	7	460	98.681	455
pt_22815_23814	1	501	SRR9887262.319512	10428	9915	95.155	516
pt_22815_23814	1	501	SRR9887262.88255	9276	8764	95.534	515
pt_22815_23814	1	501	SRR9887262.123670	15110	14601	96.289	512
pt_22815_23814	1	501	SRR9887262.24625	7204	6693	96.484	512
pt_22815_23814	1	501	SRR9887262.279619	6276	5767	95.898	512
pt_22815_23814	1	501	SRR9887262.313866	2009	2519	96.289	512
pt_22815_23814	1	501	SRR9887262.452034	3509	2998	96.484	512
pt_22815_23814	1	501	SRR9887262.61583	3937	4445	95.117	512
pt_22815_23814	1	501	SRR9887262.141423	4638	4128	96.673	511
pt_22815_23814	1	501	SRR9887262.149838	2318	1816	95.303	511
pt_22815_23814	1	501	SRR9887262.1577	10468	10977	96.477	511
pt_22815_23814	1	501	SRR9887262.21762	3412	2902	96.673	511
pt_22815_23814	1	501	SRR9887262.268413	1140	1649	96.477	511
pt_22815_23814	1	501	SRR9887262.40596	24506	23996	96.673	511
pt_22815_23814	1	501	SRR9887262.410459	7496	8003	95.89	511
pt_22815_23814	1	501	SRR9887262.43390	989	1498	96.477	511
pt_22815_23814	1	501	SRR9887262.537384	8123	8633	96.673	511
pt_22815_23814	2	501	SRR9887262.568024	3070	3575	95.499	511
pt_22815_23814	1	501	SRR9887262.590455	13129	13639	96.673	511
pt_22815_23814	1	501	SRR9887262.82445	4129	3623	96.086	511
pt_22815_23814	1	501	SRR9887262.91373	4507	5014	96.086	511
pt_22815_23814	1	501	SRR9887262.10246	9232	9741	96.863	510
pt_22815_23814	1	501	SRR9887262.110775	14320	14829	96.863	510
pt_22815_23814	1	501	SRR9887262.123822	37394	36885	96.863	510
pt_22815_23814	1	501	SRR9887262.123822	7563	8072	96.863	510
pt_22815_23814	1	501	SRR9887262.125128	9133	9642	96.863	510
pt_22815_23814	1	501	SRR9887262.152091	21295	20786	96.863	510
pt_22815_23814	1	501	SRR9887262.15516	33137	32628	96.863	510
pt_22815_23814	1	501	SRR9887262.160651	23938	24447	96.863	510
pt_22815_23814	1	501	SRR9887262.165311	2188	1679	96.863	510
pt_22815_23814	1	501	SRR9887262.170125	3598	3090	96.667	510
pt_22815_23814	1	501	SRR9887262.180610	8522	8013	96.863	510
pt_22815_23814	1	501	SRR9887262.181114	7470	7979	96.863	510
pt_22815_23814	1	501	SRR9887262.182857	2223	1714	96.863	510
pt_22815_23814	1	501	SRR9887262.186788	12575	13084	96.863	510
pt_22815_23814	1	501	SRR9887262.214329	16907	16398	96.863	510
pt_22815_23814	1	501	SRR9887262.233230	26977	27485	96.667	510
pt_22815_23814	1	501	SRR9887262.234779	38520	39029	96.863	510
pt_22815_23814	1	501	SRR9887262.259289	2768	3276	96.667	510
pt_22815_23814	1	501	SRR9887262.268412	19745	19236	96.863	510
pt_22815_23814	1	501	SRR9887262.279620	2548	3050	95.294	510
pt_22815_23814	1	501	SRR9887262.285971	34712	34203	96.863	510
pt_22815_23814	1	501	SRR9887262.290824	4670	4161	96.863	510
pt_22815_23814	1	501	SRR9887262.296155	8480	8989	96.863	510
pt_22815_23814	1	501	SRR9887262.296156	23583	24091	96.667	510
pt_22815_23814	1	501	SRR9887262.296156	11910	11401	96.863	510
pt_22815_23814	1	501	SRR9887262.296157	11919	11410	96.863	510
pt_22815_23814	1	501	SRR9887262.306972	12570	12061	96.863	510
pt_22815_23814	1	501	SRR9887262.329003	4477	3968	96.863	510
pt_22815_23814	1	501	SRR9887262.348321	35385	35894	96.863	510
pt_22815_23814	1	501	SRR9887262.37431	18499	17992	96.471	510
pt_22815_23814	1	501	SRR9887262.38657	24378	24887	96.863	510
pt_22815_23814	1	501	SRR9887262.394015	9139	8630	96.863	510
pt_22815_23814	1	501	SRR9887262.397668	10788	10279	96.863	510
pt_22815_23814	1	501	SRR9887262.402416	22586	23095	96.863	510
pt_22815_23814	1	501	SRR9887262.404751	11231	10722	96.863	510
pt_22815_23814	1	501	SRR9887262.427042	26440	26947	96.471	510
pt_22815_23814	1	501	SRR9887262.428334	2859	2351	96.667	510
pt_22815_23814	1	501	SRR9887262.437626	7422	6913	96.863	510
pt_22815_23814	1	501	SRR9887262.453471	5519	6028	96.863	510
pt_22815_23814	1	501	SRR9887262.484052	5586	5077	96.863	510
pt_22815_23814	1	501	SRR9887262.507295	771	1277	96.275	510
pt_22815_23814	1	501	SRR9887262.526698	14115	14624	96.863	510
pt_22815_23814	1	501	SRR9887262.566046	1730	2239	96.863	510
pt_22815_23814	1	501	SRR9887262.575582	13239	13748	96.863	510
pt_22815_23814	1	501	SRR9887262.575582	46439	45930	96.863	510
pt_22815_23814	1	501	SRR9887262.578750	12203	11694	96.863	510
pt_22815_23814	1	501	SRR9887262.578751	3384	3893	96.863	510
pt_22815_23814	1	501	SRR9887262.579649	12060	11551	96.863	510
pt_22815_23814	1	501	SRR9887262.58261	3685	3176	96.863	510
pt_22815_23814	1	501	SRR9887262.601095	5842	5333	96.863	510
pt_22815_23814	1	501	SRR9887262.611584	2711	3217	96.275	510
pt_22815_23814	1	501	SRR9887262.61479	8516	9025	96.863	510
pt_22815_23814	1	501	SRR9887262.626461	9716	9207	96.863	510
pt_22815_23814	1	501	SRR9887262.631435	3935	4444	96.863	510
pt_22815_23814	1	501	SRR9887262.647123	8752	8243	96.863	510
pt_22815_23814	1	501	SRR9887262.64903	6833	6325	96.667	510
pt_22815_23814	1	501	SRR9887262.655251	10280	9771	96.863	510
pt_22815_23814	1	501	SRR9887262.66290	4313	3804	96.863	510
pt_22815_23814	1	501	SRR9887262.72828	24097	23588	96.863	510
pt_22815_23814	1	501	SRR9887262.72828	43672	44181	96.863	510
pt_22815_23814	1	501	SRR9887262.78239	6751	7260	96.863	510
pt_22815_23814	1	501	SRR9887262.78253	8815	9324	96.863	510
pt_22815_23814	1	501	SRR9887262.83042	24626	24117	96.863	510
pt_22815_23814	1	501	SRR9887262.90720	18284	18793	96.863	510
pt_22815_23814	1	501	SRR9887262.278436	8326	8834	96.857	509
pt_22815_23814	1	501	SRR9887262.8519	2684	3189	96.071	509
pt_40514_41513	401	999	SRR9887262.531204	2011	2616	97.049	610
pt_40514_41513	401	1000	SRR9887262.325405	1801	1194	98.03	609
pt_40514_41513	401	1000	SRR9887262.298010	18541	17947	95.222	607
pt_40514_41513	401	1000	SRR9887262.325167	11841	11242	97.529	607
pt_40514_41513	401	1000	SRR9887262.631293	6940	7540	97.035	607
pt_40514_41513	401	1000	SRR9887262.180324	1975	2575	98.02	606
pt_40514_41513	401	1000	SRR9887262.385141	1999	1399	98.02	606
pt_40514_41513	401	1000	SRR9887262.102343	3868	4470	98.512	605
pt_40514_41513	401	1000	SRR9887262.22692	371	966	96.529	605
pt_40514_41513	401	1000	SRR9887262.632670	20211	19607	99.008	605
pt_40514_41513	401	1000	SRR9887262.643140	1716	1117	97.851	605
pt_40514_41513	401	1000	SRR9887262.162069	2920	3520	98.675	604
pt_40514_41513	401	1000	SRR9887262.17124	6658	7257	98.51	604
pt_40514_41513	401	1000	SRR9887262.287439	5225	5820	97.682	604
pt_40514_41513	401	1000	SRR9887262.397729	1514	917	98.013	604
pt_40514_41513	403	1000	SRR9887262.518503	868	1462	95.364	604
pt_40514_41513	401	1000	SRR9887262.79363	19366	19969	99.172	604
pt_40514_41513	401	1000	SRR9887262.377095	616	1216	98.839	603
pt_40514_41513	401	1000	SRR9887262.414528	4328	3730	98.673	603
pt_40514_41513	401	1000	SRR9887262.418628	16472	15870	99.171	603
pt_40514_41513	401	1000	SRR9887262.10480	3875	4474	99.169	602
pt_40514_41513	401	1000	SRR9887262.170122	1986	2584	98.837	602
pt_40514_41513	401	1000	SRR9887262.219142	5420	6021	99.502	602
pt_40514_41513	401	1000	SRR9887262.337555	28550	27950	99.003	602
pt_40514_41513	401	1000	SRR9887262.337556	826	1418	97.176	602
pt_40514_41513	401	1000	SRR9887262.452652	1980	2575	98.505	602
pt_40514_41513	401	1000	SRR9887262.591576	4382	3790	97.674	602
pt_40514_41513	401	1000	SRR9887262.61269	1991	2588	98.837	602
pt_40514_41513	401	1000	SRR9887262.119305	4625	4028	99.002	601
pt_40514_41513	401	1000	SRR9887262.128052	6740	6142	99.334	601
pt_40514_41513	401	1000	SRR9887262.158024	5342	4742	99.501	601
pt_40514_41513	401	1000	SRR9887262.451781	27590	26990	99.501	601
pt_40514_41513	401	1000	SRR9887262.530569	9087	8487	99.667	601
pt_40514_41513	401	1000	SRR9887262.571485	13026	12426	99.667	601
pt_40514_41513	401	1000	SRR9887262.631639	686	1279	98.336	601
pt_40514_41513	401	1000	SRR9887262.104980	5429	4830	99.833	600
pt_40514_41513	401	1000	SRR9887262.111193	15731	16330	99.833	600
pt_40514_41513	401	1000	SRR9887262.122067	18903	18304	99.833	600
pt_40514_41513	401	1000	SRR9887262.12478	5728	6327	99.833	600
pt_40514_41513	401	1000	SRR9887262.135375	3043	2444	99.833	600
pt_40514_41513	401	1000	SRR9887262.136897	6907	6308	99.833	600
pt_40514_41513	401	1000	SRR9887262.15934	5505	4907	99.667	600
pt_40514_41513	401	1000	SRR9887262.161757	21189	20590	99.833	600
pt_40514_41513	401	1000	SRR9887262.161861	1612	2211	99.833	600
pt_40514_41513	401	1000	SRR9887262.167147	20323	19724	99.833	600
pt_40514_41513	401	1000	SRR9887262.169278	7352	6753	99.833	600
pt_40514_41513	401	1000	SRR9887262.182435	11925	12524	99.833	600
pt_40514_41513	401	1000	SRR9887262.186124	1739	2338	99.833	600
pt_40514_41513	401	1000	SRR9887262.19094	13567	14166	99.833	600
pt_40514_41513	401	1000	SRR9887262.191446	10236	10835	99.833	600
pt_40514_41513	401	1000	SRR9887262.1988	12871	12272	99.833	600
pt_40514_41513	401	1000	SRR9887262.205436	13308	13907	99.833	600
pt_40514_41513	401	1000	SRR9887262.211773	19075	19674	99.833	600
pt_40514_41513	401	1000	SRR9887262.216535	27280	26681	99.833	600
pt_40514_41513	401	1000	SRR9887262.229449	21272	20673	99.833	600
pt_40514_41513	401	1000	SRR9887262.274178	20007	19408	99.667	600
pt_40514_41513	401	1000	SRR9887262.284833	1810	2409	99.833	600
pt_40514_41513	401	1000	SRR9887262.28779	8287	8886	99.833	600
pt_40514_41513	401	1000	SRR9887262.289583	7915	8514	99.833	600
pt_40514_41513	401	1000	SRR9887262.298009	830	1429	99.833	600
pt_40514_41513	401	1000	SRR9887262.298011	2147	2746	99.833	600
pt_40514_41513	401	1000	SRR9887262.305736	14707	15306	99.833	600
pt_40514_41513	401	1000	SRR9887262.307933	9074	9673	99.833	600
pt_40514_41513	401	1000	SRR9887262.323337	30199	30798	99.833	600
pt_40514_41513	401	1000	SRR9887262.325281	18320	17721	99.833	600
pt_40514_41513	401	1000	SRR9887262.339682	37786	38385	99.833	600
pt_40514_41513	401	1000	SRR9887262.342158	3816	4415	99.833	600
pt_40514_41513	401	1000	SRR9887262.351769	4480	5077	99.5	600
pt_40514_41513	401	1000	SRR9887262.35511	19622	19024	99.333	600
pt_40514_41513	401	1000	SRR9887262.363913	6487	5888	99.833	600
pt_40514_41513	401	1000	SRR9887262.365458	24106	24705	99.833	600
pt_40514_41513	401	1000	SRR9887262.375485	19546	18947	99.833	600
pt_40514_41513	401	1000	SRR9887262.38867	5966	5367	99.667	600
pt_40514_41513	401	1000	SRR9887262.41732	5650	5052	99.667	600
pt_40514_41513	401	1000	SRR9887262.417351	8471	9070	99.833	600
pt_40514_41513	401	1000	SRR9887262.434270	5918	6517	99.833	600
pt_40514_41513	401	1000	SRR9887262.451313	14993	15592	99.833	600
pt_40514_41513	401	1000	SRR9887262.451782	16224	16823	99.833	600
pt_40514_41513	401	1000	SRR9887262.455000	33298	32699	99.833	600
pt_40514_41513	401	1000	SRR9887262.467541	16809	17408	99.833	600
pt_40514_41513	401	1000	SRR9887262.467542	2859	2260	99.833	600
pt_40514_41513	401	1000	SRR9887262.469626	2080	2674	98.5	600
pt_40514_41513	401	1000	SRR9887262.472268	20744	20145	99.833	600
pt_40514_41513	401	1000	SRR9887262.482150	12979	12380	99.833	600
pt_40514_41513	401	1000	SRR9887262.485347	3172	2575	99.333	600
pt_40514_41513	401	1000	SRR9887262.489852	12975	13574	99.833	600
pt_40514_41513	401	1000	SRR9887262.504155	807	208	99.833	600
pt_40514_41513	401	1000	SRR9887262.509737	1991	2590	99.833	600
pt_40514_41513	401	1000	SRR9887262.510739	108	707	99.833	600
pt_40514_41513	401	1000	SRR9887262.51123	5726	6325	99.833	600
pt_40514_41513	401	1000	SRR9887262.531202	19857	19258	99.833	600
pt_40514_41513	401	1000	SRR9887262.533778	21779	21180	99.833	600
pt_40514_41513	401	1000	SRR9887262.551869	30344	29745	99.833	600
pt_40514_41513	401	1000	SRR9887262.553213	988	1587	99.833	600
pt_40514_41513	401	1000	SRR9887262.579412	13582	14181	99.833	600
pt_40514_41513	401	1000	SRR9887262.592580	19686	20285	99.833	600
pt_40514_41513	401	1000	SRR9887262.598973	6445	7044	99.833	600
pt_40514_41513	401	1000	SRR9887262.61226	3900	4499	99.833	600
pt_40514_41513	401	1000	SRR9887262.619058	8158	8757	99.833	600
pt_40514_41513	401	1000	SRR9887262.625631	16176	15577	99.833	600
pt_40514_41513	401	1000	SRR9887262.625632	1850	2449	99.833	600
pt_40514_41513	401	1000	SRR9887262.626309	5141	4542	99.833	600
pt_40514_41513	401	1000	SRR9887262.626998	2007	2605	99.667	600
pt_40514_41513	401	1000	SRR9887262.650600	1988	2583	99.167	600
pt_40514_41513	401	1000	SRR9887262.652799	17199	16600	99.833	600
pt_40514_41513	401	1000	SRR9887262.661548	3231	3830	99.833	600
pt_40514_41513	401	1000	SRR9887262.83261	9620	9021	99.833	600
pt_40514_41513	401	1000	SRR9887262.86276	14115	14714	99.833	600
pt_40514_41513	401	1000	SRR9887262.97471	12262	11664	99.667	600
pt_40514_41513	401	889	SRR9887262.228133	15036	15526	99.389	491
pt_58829_59828	501	1000	SRR9887262.238487	3784	3275	95.349	516
pt_58829_59828	501	1000	SRR9887262.226220	9694	10194	96.267	509
pt_58829_59828	501	1000	SRR9887262.431071	1341	841	96.464	509
pt_58829_59828	501	1000	SRR9887262.288510	4012	3506	98.031	508
pt_58829_59828	501	1000	SRR9887262.70856	1829	2325	96.45	507
pt_58829_59828	501	1000	SRR9887262.154978	1812	2312	97.233	506
pt_58829_59828	501	1000	SRR9887262.87170	1536	2028	95.85	506
pt_58829_59828	501	1000	SRR9887262.209297	10117	10620	98.812	505
pt_58829_59828	501	1000	SRR9887262.124688	4024	3523	98.81	504
pt_58829_59828	501	1000	SRR9887262.257526	2759	2259	98.413	504
pt_58829_59828	501	1000	SRR9887262.290016	3157	2660	98.016	504
pt_58829_59828	501	1000	SRR9887262.615040	15517	16018	98.81	504
pt_58829_59828	501	1000	SRR9887262.651674	8650	8148	99.404	503
pt_58829_59828	501	1000	SRR9887262.87961	11988	12488	99.006	503
pt_58829_59828	501	997	SRR9887262.227511	5194	5689	97.61	502
pt_58829_59828	501	1000	SRR9887262.259480	2478	1983	98.207	502
pt_58829_59828	501	1000	SRR9887262.32189	1395	1889	98.207	502
pt_58829_59828	501	1000	SRR9887262.502116	1521	1028	98.008	502
pt_58829_59828	501	1000	SRR9887262.512958	10793	10294	99.004	502
pt_58829_59828	501	1000	SRR9887262.620072	5449	4951	99.004	502
pt_58829_59828	501	1000	SRR9887262.135917	3598	3098	99.8	501
pt_58829_59828	501	1000	SRR9887262.188898	49241	49739	99.401	501
pt_58829_59828	501	1000	SRR9887262.319362	26593	27093	99.8	501
pt_58829_59828	501	1000	SRR9887262.333956	13908	13408	99.601	501
pt_58829_59828	501	1000	SRR9887262.382226	12012	11512	99.601	501
pt_58829_59828	501	1000	SRR9887262.416510	2548	3047	99.601	501
pt_58829_59828	501	1000	SRR9887262.463797	3311	3810	99.601	501
pt_58829_59828	501	1000	SRR9887262.473047	13243	12745	99.401	501
pt_58829_59828	501	1000	SRR9887262.91903	10126	9626	99.601	501
pt_58829_59828	501	1000	SRR9887262.1011	8858	8362	99.4	500
pt_58829_59828	501	1000	SRR9887262.106559	8741	8242	100	500
pt_58829_59828	501	1000	SRR9887262.132429	26547	26048	100	500
pt_58829_59828	501	1000	SRR9887262.132429	8337	8836	100	500
pt_58829_59828	501	1000	SRR9887262.138882	6799	6300	100	500
pt_58829_59828	501	1000	SRR9887262.141904	18924	19423	100	500
pt_58829_59828	501	1000	SRR9887262.144616	1591	2090	100	500
pt_58829_59828	501	1000	SRR9887262.144617	10610	10111	100	500
pt_58829_59828	501	1000	SRR9887262.144618	19717	20216	100	500
pt_58829_59828	501	1000	SRR9887262.145606	8832	8333	100	500
pt_58829_59828	501	1000	SRR9887262.149536	15242	15741	100	500
pt_58829_59828	501	1000	SRR9887262.151768	6545	7044	100	500
pt_58829_59828	501	1000	SRR9887262.161409	31439	30941	99.6	500
pt_58829_59828	501	1000	SRR9887262.164992	30472	30971	100	500
pt_58829_59828	501	1000	SRR9887262.168285	8706	9205	100	500
pt_58829_59828	501	1000	SRR9887262.188898	14990	14492	99.8	500
pt_58829_59828	501	1000	SRR9887262.191401	999	1497	99.8	500
pt_58829_59828	501	1000	SRR9887262.194434	14241	14740	100	500
pt_58829_59828	501	1000	SRR9887262.201069	13715	13218	99.6	500
pt_58829_59828	501	1000	SRR9887262.202365	10550	10052	99.8	500
pt_58829_59828	501	1000	SRR9887262.204495	11382	11881	100	500
pt_58829_59828	501	1000	SRR9887262.204662	18400	17901	100	500
pt_58829_59828	501	1000	SRR9887262.208159	12481	11982	100	500
pt_58829_59828	501	1000	SRR9887262.229075	10385	9886	100	500
pt_58829_59828	501	1000	SRR9887262.234342	7317	7816	100	500
pt_58829_59828	501	1000	SRR9887262.238712	5719	5221	99.8	500
pt_58829_59828	501	1000	SRR9887262.241266	595	1092	99.6	500
pt_58829_59828	501	1000	SRR9887262.252706	6540	7039	100	500
pt_58829_59828	501	1000	SRR9887262.26380	2162	2660	99.8	500
pt_58829_59828	501	1000	SRR9887262.277680	24743	24244	100	500
pt_58829_59828	501	1000	SRR9887262.287436	14979	14480	100	500
pt_58829_59828	501	1000	SRR9887262.289513	15047	14548	100	500
pt_58829_59828	501	1000	SRR9887262.28954	7381	6882	100	500
pt_58829_59828	501	1000	SRR9887262.290015	22553	23052	100	500
pt_58829_59828	501	1000	SRR9887262.294715	6785	6286	100	500
pt_58829_59828	501	1000	SRR9887262.305116	34734	35233	100	500
pt_58829_59828	501	1000	SRR9887262.305117	6489	5991	99.8	500
pt_58829_59828	501	1000	SRR9887262.308626	28840	29339	100	500
pt_58829_59828	501	1000	SRR9887262.322323	1025	531	99	500
pt_58829_59828	501	1000	SRR9887262.324558	4626	5123	99.6	500
pt_58829_59828	501	1000	SRR9887262.324643	2531	2033	99.8	500
pt_58829_59828	501	1000	SRR9887262.331929	2817	2319	99.8	500
pt_58829_59828	501	1000	SRR9887262.3434	6600	6102	99.8	500
pt_58829_59828	501	1000	SRR9887262.346347	11499	11000	100	500
pt_58829_59828	501	1000	SRR9887262.363569	12462	11963	100	500
pt_58829_59828	501	1000	SRR9887262.382660	8366	8865	100	500
pt_58829_59828	501	1000	SRR9887262.385255	9145	9644	100	500
pt_58829_59828	501	1000	SRR9887262.389484	11957	11458	100	500
pt_58829_59828	501	1000	SRR9887262.412982	8394	7895	100	500
pt_58829_59828	501	1000	SRR9887262.414935	5791	5292	100	500
pt_58829_59828	501	1000	SRR9887262.419231	353	850	99.6	500
pt_58829_59828	501	1000	SRR9887262.441123	2115	2614	100	500
pt_58829_59828	501	1000	SRR9887262.443829	4934	4435	100	500
pt_58829_59828	501	1000	SRR9887262.450546	4714	5213	100	500
pt_58829_59828	501	1000	SRR9887262.455054	16899	17398	100	500
pt_58829_59828	501	1000	SRR9887262.474538	27844	27346	99.8	500
pt_58829_59828	501	1000	SRR9887262.475905	26135	25636	100	500
pt_58829_59828	501	1000	SRR9887262.508171	5059	4560	100	500
pt_58829_59828	501	1000	SRR9887262.511437	6734	6235	100	500
pt_58829_59828	501	1000	SRR9887262.516871	6138	6637	100	500
pt_58829_59828	501	1000	SRR9887262.519494	1100	603	99.6	500
pt_58829_59828	501	1000	SRR9887262.52040	4346	3847	100	500
pt_58829_59828	501	1000	SRR9887262.520653	2976	3467	98.2	500
pt_58829_59828	501	1000	SRR9887262.521180	6118	5619	100	500
pt_58829_59828	501	1000	SRR9887262.525167	9068	8569	100	500
pt_58829_59828	501	1000	SRR9887262.54539	3729	4225	99	500
pt_58829_59828	501	1000	SRR9887262.557484	19820	20318	99.8	500
pt_58829_59828	501	1000	SRR9887262.558590	15201	15700	100	500
pt_58829_59828	501	1000	SRR9887262.562952	14594	14095	100	500
pt_58829_59828	501	1000	SRR9887262.5672	2166	1667	100	500
pt_58829_59828	501	1000	SRR9887262.568598	6984	6487	99.6	500
pt_58829_59828	501	1000	SRR9887262.581886	15571	16070	100	500
pt_58829_59828	501	1000	SRR9887262.610536	7278	6779	100	500
pt_58829_59828	501	1000	SRR9887262.618222	13786	14285	100	500
pt_58829_59828	501	1000	SRR9887262.634231	3223	2726	99.6	500
pt_58829_59828	501	1000	SRR9887262.641174	17684	17185	100	500
pt_58829_59828	501	1000	SRR9887262.64410	5782	5283	100	500
pt_58829_59828	501	1000	SRR9887262.649314	2703	3202	100	500
pt_58829_59828	501	1000	SRR9887262.70712	12002	12501	100	500
pt_58829_59828	501	1000	SRR9887262.81262	23544	24043	100	500
pt_58829_59828	501	1000	SRR9887262.99510	2898	2400	99.8	500
pt_58829_59828	509	1000	SRR9887262.556390	3870	3380	96.185	498
pt_366457_367456	1	501	SRR9887262.189530	2985	2474	96.311	515
pt_366457_367456	2	501	SRR9887262.209297	8921	9432	96.498	514
pt_366457_367456	1	501	SRR9887262.161116	3476	3975	96.071	509
pt_366457_367456	1	501	SRR9887262.227511	4034	4534	96.654	508
pt_366457_367456	1	501	SRR9887262.264159	1111	1612	96.457	508
pt_366457_367456	1	501	SRR9887262.288510	5200	4694	97.638	508
pt_366457_367456	1	501	SRR9887262.237909	19264	19768	98.419	506
pt_366457_367456	1	501	SRR9887262.99510	4077	3574	98.221	506
pt_366457_367456	1	501	SRR9887262.1011	10035	9534	98.218	505
pt_366457_367456	1	501	SRR9887262.412982	9580	9080	97.822	505
pt_366457_367456	1	501	SRR9887262.463797	2119	2621	98.02	505
pt_366457_367456	1	501	SRR9887262.615040	14333	14837	98.812	505
pt_366457_367456	1	501	SRR9887262.315104	1072	574	98.016	504
pt_366457_367456	5	501	SRR9887262.431071	2509	2011	95.635	504
pt_366457_367456	1	501	SRR9887262.502116	2704	2202	98.81	504
pt_366457_367456	1	501	SRR9887262.226220	8482	8982	98.608	503
pt_366457_367456	1	501	SRR9887262.229958	1287	792	97.614	503
pt_366457_367456	1	501	SRR9887262.331929	3993	3491	99.205	503
pt_366457_367456	1	501	SRR9887262.346347	12674	12174	99.006	503
pt_366457_367456	1	501	SRR9887262.144616	416	916	99.203	502
pt_366457_367456	1	501	SRR9887262.144617	11786	11285	99.402	502
pt_366457_367456	1	501	SRR9887262.149536	14067	14567	99.203	502
pt_366457_367456	1	501	SRR9887262.168285	7529	8030	99.402	502
pt_366457_367456	1	501	SRR9887262.204495	10204	10705	99.203	502
pt_366457_367456	1	501	SRR9887262.257526	3930	3433	98.008	502
pt_366457_367456	1	501	SRR9887262.259480	3645	3147	98.805	502
pt_366457_367456	1	501	SRR9887262.319362	25418	25918	99.402	502
pt_366457_367456	1	501	SRR9887262.333956	15080	14582	98.008	502
pt_366457_367456	1	501	SRR9887262.382226	13188	12688	99.203	502
pt_366457_367456	1	501	SRR9887262.649314	1527	2028	99.203	502
pt_366457_367456	1	501	SRR9887262.106559	9916	9417	99.202	501
pt_366457_367456	1	501	SRR9887262.124688	5198	4699	99.401	501
pt_366457_367456	1	501	SRR9887262.132429	27722	27223	99.401	501
pt_366457_367456	1	501	SRR9887262.132429	7159	7659	99.601	501
pt_366457_367456	1	501	SRR9887262.135917	4771	4273	99.202	501
pt_366457_367456	1	501	SRR9887262.138882	7972	7474	99.202	501
pt_366457_367456	1	501	SRR9887262.141904	17748	18248	99.601	501
pt_366457_367456	1	501	SRR9887262.144618	18541	19041	99.601	501
pt_366457_367456	1	501	SRR9887262.145606	10014	9514	99.601	501
pt_366457_367456	1	501	SRR9887262.151768	5371	5871	99.601	501
pt_366457_367456	1	501	SRR9887262.161409	32613	32115	99.202	501
pt_366457_367456	1	501	SRR9887262.164992	29297	29797	99.601	501
pt_366457_367456	1	501	SRR9887262.188898	16166	15666	99.601	501
pt_366457_367456	1	501	SRR9887262.188898	48068	48568	99.601	501
pt_366457_367456	1	501	SRR9887262.194434	13066	13566	99.601	501
pt_366457_367456	1	501	SRR9887262.201069	14890	14390	99.601	501
pt_366457_367456	2	501	SRR9887262.201963	2493	2004	96.806	501
pt_366457_367456	1	501	SRR9887262.202365	11725	11226	99.401	501
pt_366457_367456	1	501	SRR9887262.204662	19576	19076	99.601	501
pt_366457_367456	1	501	SRR9887262.208159	13657	13157	99.601	501
pt_366457_367456	1	501	SRR9887262.229075	11562	11062	99.601	501
pt_366457_367456	1	501	SRR9887262.234342	6141	6641	99.601	501
pt_366457_367456	1	501	SRR9887262.238712	6894	6395	99.401	501
pt_366457_367456	1	501	SRR9887262.252706	5364	5864	99.601	501
pt_366457_367456	1	501	SRR9887262.26380	982	1481	99.401	501
pt_366457_367456	1	501	SRR9887262.277680	25919	25419	99.601	501
pt_366457_367456	1	501	SRR9887262.287436	16155	15655	99.601	501
pt_366457_367456	1	501	SRR9887262.289513	16221	15721	99.601	501
pt_366457_367456	1	501	SRR9887262.28954	8557	8057	99.601	501
pt_366457_367456	1	501	SRR9887262.290015	21381	21880	99.401	501
pt_366457_367456	1	501	SRR9887262.294715	7959	7461	99.202	501
pt_366457_367456	1	501	SRR9887262.305116	33559	34059	99.601	501
pt_366457_367456	1	501	SRR9887262.305117	7662	7165	99.002	501
pt_366457_367456	1	501	SRR9887262.308626	27664	28164	99.601	501
pt_366457_367456	1	501	SRR9887262.322323	2200	1700	99.601	501
pt_366457_367456	1	501	SRR9887262.324558	3453	3952	99.401	501
pt_366457_367456	1	501	SRR9887262.324643	3703	3205	99.202	501
pt_366457_367456	1	501	SRR9887262.3434	7776	7276	99.601	501
pt_366457_367456	1	501	SRR9887262.363569	13640	13140	99.601	501
pt_366457_367456	1	501	SRR9887262.382660	7190	7690	99.601	501
pt_366457_367456	1	501	SRR9887262.385255	7969	8469	99.601	501
pt_366457_367456	1	501	SRR9887262.389484	13133	12633	99.601	501
pt_366457_367456	1	501	SRR9887262.414935	6966	6466	99.601	501
pt_366457_367456	1	501	SRR9887262.416510	1374	1873	99.202	501
pt_366457_367456	1	501	SRR9887262.441123	940	1439	99.401	501
pt_366457_367456	1	501	SRR9887262.443829	6108	5610	99.202	501
pt_366457_367456	1	501	SRR9887262.450546	3539	4039	99.401	501
pt_366457_367456	1	501	SRR9887262.455054	15725	16224	99.401	501
pt_366457_367456	1	501	SRR9887262.473047	14414	13914	99.8	501
pt_366457_367456	1	501	SRR9887262.474538	29019	28520	99.401	501
pt_366457_367456	1	501	SRR9887262.508171	6234	5734	99.601	501
pt_366457_367456	1	501	SRR9887262.511437	7909	7409	99.601	501
pt_366457_367456	1	501	SRR9887262.512958	11967	11468	99.401	501
pt_366457_367456	1	501	SRR9887262.516871	4962	5462	99.601	501
pt_366457_367456	1	501	SRR9887262.519494	2274	1775	99.401	501
pt_366457_367456	1	501	SRR9887262.52040	5519	5020	99.401	501
pt_366457_367456	1	501	SRR9887262.521180	7292	6792	99.601	501
pt_366457_367456	1	501	SRR9887262.525167	10244	9744	99.601	501
pt_366457_367456	1	501	SRR9887262.54539	2557	3056	99.202	501
pt_366457_367456	1	501	SRR9887262.557484	18644	19144	99.601	501
pt_366457_367456	1	501	SRR9887262.558590	14025	14525	99.601	501
pt_366457_367456	1	501	SRR9887262.562952	15770	15270	99.601	501
pt_366457_367456	1	501	SRR9887262.5672	3342	2842	99.401	501
pt_366457_367456	1	501	SRR9887262.568598	8155	7658	99.002	501
pt_366457_367456	1	501	SRR9887262.581886	14395	14895	99.601	501
pt_366457_367456	1	501	SRR9887262.610536	8454	7954	99.401	501
pt_366457_367456	1	501	SRR9887262.618222	12612	13110	99.202	501
pt_366457_367456	1	501	SRR9887262.620072	6624	6125	99.401	501
pt_366457_367456	1	501	SRR9887262.634231	4395	3896	99.401	501
pt_366457_367456	1	501	SRR9887262.641174	18860	18360	99.601	501
pt_366457_367456	1	501	SRR9887262.64410	6956	6456	99.601	501
pt_366457_367456	1	501	SRR9887262.651674	9825	9325	99.601	501
pt_366457_367456	1	501	SRR9887262.6667	1792	1296	98.204	501
pt_366457_367456	1	501	SRR9887262.70712	10830	11328	99.202	501
pt_366457_367456	1	501	SRR9887262.77352	1608	1110	99.202	501
pt_366457_367456	1	501	SRR9887262.81262	22369	22869	99.601	501
pt_366457_367456	1	501	SRR9887262.87961	10818	11316	99.202	501
pt_366457_367456	1	501	SRR9887262.91903	11300	10800	99.601	501
pt_613400_614399	1	505	SRR9887262.631293	4903	5415	95.192	520
pt_613400_614399	497	1000	SRR9887262.132546	10591	11105	96.905	517
pt_613400_614399	1	505	SRR9887262.102343	1818	2329	96.512	516
pt_613400_614399	497	1000	SRR9887262.362562	5755	6267	95.93	516
pt_613400_614399	1	505	SRR9887262.328696	1850	1348	95.322	513
pt_613400_614399	1	505	SRR9887262.643140	3766	3256	97.076	513
pt_613400_614399	497	1000	SRR9887262.160238	14974	15485	98.047	512
pt_613400_614399	497	1000	SRR9887262.445112	9355	9862	96.68	512
pt_613400_614399	1	505	SRR9887262.571485	15066	14557	97.852	512
pt_613400_614399	1	505	SRR9887262.482150	15022	14512	98.434	511
pt_613400_614399	497	1000	SRR9887262.591274	35391	35900	98.824	510
pt_613400_614399	1	505	SRR9887262.591576	6405	5901	97.647	510
pt_613400_614399	497	1000	SRR9887262.607520	2059	2566	98.431	510
pt_613400_614399	1	505	SRR9887262.128052	8775	8270	97.839	509
pt_613400_614399	497	1000	SRR9887262.286634	1347	841	98.625	509
pt_613400_614399	1	505	SRR9887262.467541	14760	15267	98.625	509
pt_613400_614399	1	505	SRR9887262.162069	892	1397	98.622	508
pt_613400_614399	1	505	SRR9887262.351996	2820	3319	96.654	508
pt_613400_614399	497	1000	SRR9887262.243279	1370	1871	98.422	507
pt_613400_614399	3	505	SRR9887262.298011	119	618	97.436	507
pt_613400_614399	1	505	SRR9887262.323337	28165	28668	98.422	507
pt_613400_614399	1	505	SRR9887262.359257	6528	7030	98.422	507
pt_613400_614399	1	505	SRR9887262.41732	7684	7180	98.817	507
pt_613400_614399	497	1000	SRR9887262.424535	5236	4732	99.014	507
pt_613400_614399	1	505	SRR9887262.460592	10697	11198	98.225	507
pt_613400_614399	1	505	SRR9887262.65693	2134	1640	96.252	507
pt_613400_614399	1	505	SRR9887262.10480	1845	2342	97.431	506
pt_613400_614399	1	505	SRR9887262.119305	6654	6153	98.617	506
pt_613400_614399	1	505	SRR9887262.17124	4624	5128	99.209	506
pt_613400_614399	1	505	SRR9887262.19094	11531	12035	99.209	506
pt_613400_614399	1	505	SRR9887262.228133	12999	13503	99.209	506
pt_613400_614399	497	1000	SRR9887262.329883	3999	4500	98.814	506
pt_613400_614399	497	1000	SRR9887262.349616	3976	3476	98.419	506
pt_613400_614399	1	505	SRR9887262.385141	4022	3519	98.419	506
pt_613400_614399	497	1000	SRR9887262.387522	5282	4784	97.826	506
pt_613400_614399	497	1000	SRR9887262.45100	28117	27624	96.838	506
pt_613400_614399	497	1000	SRR9887262.572390	3893	4397	99.407	506
pt_613400_614399	1	505	SRR9887262.579412	11545	12049	99.012	506
pt_613400_614399	497	998	SRR9887262.650179	439	944	99.209	506
pt_613400_614399	497	1000	SRR9887262.9821	7635	8140	99.605	506
pt_613400_614399	1	505	SRR9887262.104980	7465	6961	99.208	505
pt_613400_614399	1	505	SRR9887262.111193	13694	14198	99.604	505
pt_613400_614399	497	1000	SRR9887262.120234	1756	2255	98.812	505
pt_613400_614399	1	505	SRR9887262.122067	20940	20437	98.416	505
pt_613400_614399	1	505	SRR9887262.12478	3692	4196	99.604	505
pt_613400_614399	1	505	SRR9887262.135375	5079	4575	99.604	505
pt_613400_614399	1	505	SRR9887262.136897	8946	8442	99.604	505
pt_613400_614399	1	505	SRR9887262.146080	1852	1348	99.604	505
pt_613400_614399	1	505	SRR9887262.158024	7379	6875	99.604	505
pt_613400_614399	1	505	SRR9887262.15934	7539	7035	99.604	505
pt_613400_614399	1	505	SRR9887262.161757	23221	22717	99.604	505
pt_613400_614399	1	505	SRR9887262.167147	22360	21856	99.604	505
pt_613400_614399	1	505	SRR9887262.169278	9386	8885	99.01	505
pt_613400_614399	1	505	SRR9887262.182435	9888	10392	99.604	505
pt_613400_614399	1	505	SRR9887262.191446	8199	8703	99.604	505
pt_613400_614399	497	1000	SRR9887262.203401	44919	45422	99.406	505
pt_613400_614399	1	505	SRR9887262.205436	11273	11777	99.604	505
pt_613400_614399	1	505	SRR9887262.211773	17037	17541	99.604	505
pt_613400_614399	1	505	SRR9887262.216535	29317	28813	99.604	505
pt_613400_614399	1	505	SRR9887262.219142	3386	3889	99.406	505
pt_613400_614399	1	505	SRR9887262.229449	23309	22805	99.604	505
pt_613400_614399	500	1000	SRR9887262.25898	10044	9549	97.426	505
pt_613400_614399	1	505	SRR9887262.274178	22042	21539	99.406	505
pt_613400_614399	1	505	SRR9887262.287439	3203	3703	98.614	505
pt_613400_614399	1	505	SRR9887262.28779	6250	6754	99.604	505
pt_613400_614399	1	505	SRR9887262.289583	5878	6382	99.604	505
pt_613400_614399	1	505	SRR9887262.298010	20578	20074	99.604	505
pt_613400_614399	1	505	SRR9887262.305736	12670	13174	99.208	505
pt_613400_614399	497	1000	SRR9887262.306407	2942	2438	99.802	505
pt_613400_614399	1	505	SRR9887262.307933	7037	7541	99.604	505
pt_613400_614399	1	505	SRR9887262.325281	20357	19853	99.604	505
pt_613400_614399	1	505	SRR9887262.325405	3835	3332	99.406	505
pt_613400_614399	497	1000	SRR9887262.339359	4654	4155	98.812	505
pt_613400_614399	1	505	SRR9887262.339682	35750	36253	99.406	505
pt_613400_614399	1	505	SRR9887262.340672	2316	1812	99.604	505
pt_613400_614399	1	505	SRR9887262.342158	1779	2283	99.604	505
pt_613400_614399	1	505	SRR9887262.351769	2444	2947	99.406	505
pt_613400_614399	1	505	SRR9887262.35511	21658	21155	99.406	505
pt_613400_614399	1	505	SRR9887262.363913	8524	8020	99.604	505
pt_613400_614399	1	505	SRR9887262.364908	7071	7574	99.406	505
pt_613400_614399	1	505	SRR9887262.365458	22071	22574	99.406	505
pt_613400_614399	1	505	SRR9887262.375485	21581	21079	99.208	505
pt_613400_614399	1	505	SRR9887262.38867	8000	7497	99.406	505
pt_613400_614399	1	505	SRR9887262.397729	3544	3041	99.406	505
pt_613400_614399	1	505	SRR9887262.414528	6359	5856	99.406	505
pt_613400_614399	497	1000	SRR9887262.415762	27873	27369	99.802	505
pt_613400_614399	1	505	SRR9887262.417351	6435	6939	99.604	505
pt_613400_614399	1	504	SRR9887262.419705	1020	518	99.01	505
pt_613400_614399	1	505	SRR9887262.434270	3881	4385	99.604	505
pt_613400_614399	1	505	SRR9887262.451313	12957	13460	99.406	505
pt_613400_614399	1	505	SRR9887262.451781	29624	29120	99.604	505
pt_613400_614399	1	505	SRR9887262.451782	14189	14692	99.406	505
pt_613400_614399	1	505	SRR9887262.455000	35335	34831	99.604	505
pt_613400_614399	1	505	SRR9887262.467542	4895	4392	99.406	505
pt_613400_614399	1	505	SRR9887262.472268	22781	22277	99.604	505
pt_613400_614399	497	1000	SRR9887262.479024	3117	2616	99.208	505
pt_613400_614399	1	505	SRR9887262.485347	5199	4704	97.822	505
pt_613400_614399	1	505	SRR9887262.489852	10938	11442	99.604	505
pt_613400_614399	497	1000	SRR9887262.497790	10263	9760	99.604	505
pt_613400_614399	1	505	SRR9887262.504155	2842	2338	99.604	505
pt_613400_614399	1	505	SRR9887262.51123	3691	4194	99.406	505
pt_613400_614399	1	505	SRR9887262.531202	21893	21389	99.604	505
pt_613400_614399	1	505	SRR9887262.551869	32380	31877	99.406	505
pt_613400_614399	1	505	SRR9887262.592580	17650	18153	99.406	505
pt_613400_614399	1	505	SRR9887262.592913	1886	1382	99.604	505
pt_613400_614399	1	505	SRR9887262.598973	4409	4913	99.604	505
pt_613400_614399	1	505	SRR9887262.602598	1635	1134	99.01	505
pt_613400_614399	1	505	SRR9887262.61226	1864	2368	99.604	505
pt_613400_614399	1	505	SRR9887262.619058	6122	6626	99.406	505
pt_613400_614399	1	505	SRR9887262.626309	7178	6674	99.604	505
pt_613400_614399	1	505	SRR9887262.632670	22249	21745	99.604	505
pt_613400_614399	1	505	SRR9887262.661548	1192	1696	99.604	505
pt_613400_614399	1	505	SRR9887262.666039	18551	19055	99.604	505
pt_613400_614399	1	505	SRR9887262.79363	17328	17832	99.406	505
pt_613400_614399	1	505	SRR9887262.83261	11655	11151	99.406	505
pt_613400_614399	1	505	SRR9887262.86276	12080	12583	99.406	505
pt_613400_614399	1	505	SRR9887262.97471	14299	13795	99.604	505
pt_613400_614399	497	1000	SRR9887262.112909	14337	14840	99.802	504
pt_613400_614399	497	1000	SRR9887262.123342	14933	15436	100	504
pt_613400_614399	497	1000	SRR9887262.12530	12692	13195	100	504
pt_613400_614399	497	1000	SRR9887262.126934	1021	518	100	504
pt_613400_614399	497	1000	SRR9887262.152451	18046	17543	100	504
pt_613400_614399	497	1000	SRR9887262.15516	63753	63250	100	504
pt_613400_614399	497	1000	SRR9887262.170820	4570	5073	100	504
pt_613400_614399	497	1000	SRR9887262.176087	5557	6060	100	504
pt_613400_614399	497	1000	SRR9887262.198985	14543	14040	100	504
pt_613400_614399	497	1000	SRR9887262.198986	15802	16305	100	504
pt_613400_614399	497	1000	SRR9887262.204982	5157	4656	99.603	504
pt_613400_614399	497	1000	SRR9887262.234779	7906	8409	100	504
pt_613400_614399	497	1000	SRR9887262.255346	19236	18733	100	504
pt_613400_614399	497	1000	SRR9887262.258756	3492	3993	99.603	504
pt_613400_614399	497	1000	SRR9887262.262	9908	10411	100	504
pt_613400_614399	497	1000	SRR9887262.266218	11306	10803	100	504
pt_613400_614399	497	1000	SRR9887262.280348	5161	4658	100	504
pt_613400_614399	497	1000	SRR9887262.296850	3128	3629	99.603	504
pt_613400_614399	497	1000	SRR9887262.312218	21312	20809	100	504
pt_613400_614399	497	1000	SRR9887262.317413	10768	10265	100	504
pt_613400_614399	497	1000	SRR9887262.327092	2747	3247	99.405	504
pt_613400_614399	497	1000	SRR9887262.332499	5588	5085	100	504
pt_613400_614399	497	1000	SRR9887262.345090	3929	4432	100	504
pt_613400_614399	497	1000	SRR9887262.348321	4778	5281	100	504
pt_613400_614399	497	1000	SRR9887262.353800	12505	12002	100	504
pt_613400_614399	497	1000	SRR9887262.405790	13429	13932	100	504
pt_613400_614399	497	1000	SRR9887262.407202	9111	8608	100	504
pt_613400_614399	497	1000	SRR9887262.407203	13777	14279	99.802	504
pt_613400_614399	497	1000	SRR9887262.409782	17651	18154	100	504
pt_613400_614399	497	1000	SRR9887262.419289	462	963	99.603	504
pt_613400_614399	497	1000	SRR9887262.437990	8245	7742	100	504
pt_613400_614399	497	1000	SRR9887262.448479	8639	8136	100	504
pt_613400_614399	497	1000	SRR9887262.45100	15360	15863	100	504
pt_613400_614399	497	1000	SRR9887262.459905	21046	21549	100	504
pt_613400_614399	497	1000	SRR9887262.463428	11303	10800	100	504
pt_613400_614399	497	1000	SRR9887262.468965	24192	23689	100	504
pt_613400_614399	497	1000	SRR9887262.48008	4343	4845	99.802	504
pt_613400_614399	497	1000	SRR9887262.495048	21660	21157	100	504
pt_613400_614399	497	1000	SRR9887262.497245	2742	3245	100	504
pt_613400_614399	497	1000	SRR9887262.497786	9466	8963	100	504
pt_613400_614399	497	1000	SRR9887262.497787	6816	7319	100	504
pt_613400_614399	497	1000	SRR9887262.497788	10199	9696	100	504
pt_613400_614399	497	1000	SRR9887262.497789	6819	7322	100	504
pt_613400_614399	497	1000	SRR9887262.500595	29871	30374	100	504
pt_613400_614399	497	1000	SRR9887262.510120	7870	7367	100	504
pt_613400_614399	497	1000	SRR9887262.513947	18505	19008	100	504
pt_613400_614399	497	1000	SRR9887262.515144	5436	5939	100	504
pt_613400_614399	497	1000	SRR9887262.529	10028	9525	100	504
pt_613400_614399	497	1000	SRR9887262.559655	13525	14028	100	504
pt_613400_614399	497	1000	SRR9887262.562177	37856	38359	100	504
pt_613400_614399	497	1000	SRR9887262.562352	3646	3143	100	504
pt_613400_614399	497	1000	SRR9887262.564421	6233	6736	100	504
pt_613400_614399	497	1000	SRR9887262.571904	5571	6073	99.802	504
pt_613400_614399	497	1000	SRR9887262.57232	7298	7801	100	504
pt_613400_614399	497	1000	SRR9887262.575514	5406	4903	100	504
pt_613400_614399	497	1000	SRR9887262.581003	16916	16413	100	504
pt_613400_614399	497	1000	SRR9887262.596372	3485	2985	99.206	504
pt_613400_614399	497	1000	SRR9887262.601570	10176	10679	100	504
pt_613400_614399	497	1000	SRR9887262.611485	1116	613	100	504
pt_613400_614399	497	1000	SRR9887262.616163	18042	17539	100	504
pt_613400_614399	497	1000	SRR9887262.624762	2588	2085	100	504
pt_613400_614399	497	1000	SRR9887262.641315	14340	13837	100	504
pt_613400_614399	497	1000	SRR9887262.642695	16988	16485	100	504
pt_613400_614399	497	1000	SRR9887262.663958	12528	13031	100	504
pt_613400_614399	497	1000	SRR9887262.666057	6504	7007	100	504
pt_613400_614399	498	1000	SRR9887262.299312	12190	11689	99.801	503
pt_613400_614399	4	505	SRR9887262.625932	6191	6682	95.626	503
pt_613400_614399	3	505	SRR9887262.652799	19233	18731	99.602	503
pt_613400_614399	25	505	SRR9887262.626998	1	480	98.96	481
pt_613400_614399	27	505	SRR9887262.533778	23793	23315	99.582	479
pt_613400_614399	41	505	SRR9887262.650600	2	468	97.452	471
pt_613400_614399	41	505	SRR9887262.531204	2	468	97.872	470
pt_613400_614399	45	505	SRR9887262.170122	1	456	95.096	469
pt_613400_614399	45	505	SRR9887262.61269	1	461	97.002	467
pt_613400_614399	45	505	SRR9887262.509737	1	461	99.351	462
pt_779175_780174	1	501	SRR9887262.319512	9597	10105	95.89	511
pt_779175_780174	1	501	SRR9887262.390673	8938	8428	97.065	511
pt_779175_780174	1	501	SRR9887262.61583	4762	4260	95.686	510
pt_779175_780174	1	501	SRR9887262.449975	2932	2432	96.055	507
pt_779175_780174	1	501	SRR9887262.118568	3253	3753	95.85	506
pt_779175_780174	1	501	SRR9887262.149838	1503	2001	96.436	505
pt_779175_780174	1	501	SRR9887262.568024	3885	3390	96.634	505
pt_779175_780174	1	501	SRR9887262.91373	5332	4829	98.02	505
pt_779175_780174	1	501	SRR9887262.170125	2774	3276	98.214	504
pt_779175_780174	1	501	SRR9887262.220156	748	258	95.437	504
pt_779175_780174	1	501	SRR9887262.317830	1164	672	96.032	504
pt_779175_780174	1	501	SRR9887262.88255	8451	8952	97.421	504
pt_779175_780174	1	501	SRR9887262.123670	14287	14787	98.211	503
pt_779175_780174	1	501	SRR9887262.24625	6381	6881	98.211	503
pt_779175_780174	1	501	SRR9887262.402416	23408	22909	98.012	503
pt_779175_780174	1	501	SRR9887262.452034	2685	3186	98.41	503
pt_779175_780174	1	501	SRR9887262.1577	11291	10790	98.805	502
pt_779175_780174	1	501	SRR9887262.165311	1365	1865	98.606	502
pt_779175_780174	1	501	SRR9887262.182857	1400	1900	98.606	502
pt_779175_780174	1	501	SRR9887262.268413	1963	1462	98.805	502
pt_779175_780174	1	501	SRR9887262.279620	3364	2865	98.207	502
pt_779175_780174	1	501	SRR9887262.313866	2832	2334	98.207	502
pt_779175_780174	1	501	SRR9887262.397668	9964	10465	98.805	502
pt_779175_780174	1	501	SRR9887262.43390	1811	1312	98.406	502
pt_779175_780174	1	501	SRR9887262.537384	8947	8446	98.805	502
pt_779175_780174	1	501	SRR9887262.590455	13953	13452	98.805	502
pt_779175_780174	1	501	SRR9887262.64903	6010	6511	98.805	502
pt_779175_780174	1	501	SRR9887262.82445	3310	3809	98.406	502
pt_779175_780174	1	501	SRR9887262.10246	10055	9555	99.002	501
pt_779175_780174	1	501	SRR9887262.110775	15142	14643	98.802	501
pt_779175_780174	1	501	SRR9887262.123822	36571	37071	99.002	501
pt_779175_780174	1	501	SRR9887262.123822	8386	7886	99.002	501
pt_779175_780174	1	501	SRR9887262.125128	9956	9456	99.002	501
pt_779175_780174	1	501	SRR9887262.141423	3814	4314	99.002	501
pt_779175_780174	1	501	SRR9887262.152091	20472	20972	99.002	501
pt_779175_780174	1	501	SRR9887262.15516	32314	32814	98.603	501
pt_779175_780174	1	501	SRR9887262.160651	24761	24261	99.002	501
pt_779175_780174	1	501	SRR9887262.180610	7699	8199	99.002	501
pt_779175_780174	1	501	SRR9887262.181114	8293	7793	99.002	501
pt_779175_780174	1	501	SRR9887262.186788	13398	12898	99.002	501
pt_779175_780174	1	501	SRR9887262.214329	16084	16584	99.002	501
pt_779175_780174	1	501	SRR9887262.21762	2589	3088	98.802	501
pt_779175_780174	1	501	SRR9887262.233230	27799	27299	99.002	501
pt_779175_780174	1	501	SRR9887262.234779	39343	38843	99.002	501
pt_779175_780174	1	501	SRR9887262.259289	3590	3090	99.002	501
pt_779175_780174	1	501	SRR9887262.268412	18922	19422	99.002	501
pt_779175_780174	1	501	SRR9887262.278436	9146	8648	98.403	501
pt_779175_780174	1	501	SRR9887262.279619	5453	5953	99.002	501
pt_779175_780174	1	501	SRR9887262.285971	33889	34389	99.002	501
pt_779175_780174	1	501	SRR9887262.290824	3847	4347	99.002	501
pt_779175_780174	1	501	SRR9887262.296155	9303	8803	99.002	501
pt_779175_780174	1	501	SRR9887262.296156	11087	11587	99.002	501
pt_779175_780174	1	501	SRR9887262.296156	24405	23905	99.002	501
pt_779175_780174	1	501	SRR9887262.296157	11096	11596	99.002	501
pt_779175_780174	1	501	SRR9887262.306972	11747	12247	99.002	501
pt_779175_780174	1	501	SRR9887262.329003	3654	4154	99.002	501
pt_779175_780174	1	501	SRR9887262.348321	36208	35708	99.002	501
pt_779175_780174	1	501	SRR9887262.37431	17678	18176	98.603	501
pt_779175_780174	1	501	SRR9887262.38657	25201	24701	99.002	501
pt_779175_780174	1	501	SRR9887262.394015	8316	8816	99.002	501
pt_779175_780174	1	501	SRR9887262.404751	10408	10908	99.002	501
pt_779175_780174	1	501	SRR9887262.40596	23682	24182	99.002	501
pt_779175_780174	1	501	SRR9887262.410459	8313	7817	98.004	501
pt_779175_780174	1	501	SRR9887262.427042	27261	26761	99.002	501
pt_779175_780174	1	501	SRR9887262.428334	2038	2536	98.603	501
pt_779175_780174	1	501	SRR9887262.437626	6599	7099	99.002	501
pt_779175_780174	1	501	SRR9887262.453471	6342	5842	99.002	501
pt_779175_780174	1	501	SRR9887262.484052	4763	5263	99.002	501
pt_779175_780174	1	501	SRR9887262.507295	1589	1091	98.603	501
pt_779175_780174	1	501	SRR9887262.526698	14938	14438	99.002	501
pt_779175_780174	1	501	SRR9887262.566046	2553	2053	99.002	501
pt_779175_780174	1	501	SRR9887262.575582	14062	13562	99.002	501
pt_779175_780174	1	501	SRR9887262.575582	45616	46116	99.002	501
pt_779175_780174	1	501	SRR9887262.578750	11381	11880	98.802	501
pt_779175_780174	1	501	SRR9887262.578751	4207	3707	99.002	501
pt_779175_780174	1	501	SRR9887262.579649	11237	11737	99.002	501
pt_779175_780174	1	501	SRR9887262.58261	2863	3362	98.802	501
pt_779175_780174	1	501	SRR9887262.601095	5019	5519	99.002	501
pt_779175_780174	1	501	SRR9887262.611584	3531	3031	99.002	501
pt_779175_780174	1	501	SRR9887262.61479	9339	8839	99.002	501
pt_779175_780174	1	501	SRR9887262.626461	8893	9393	99.002	501
pt_779175_780174	1	501	SRR9887262.631435	4758	4258	99.002	501
pt_779175_780174	1	501	SRR9887262.647123	7929	8429	99.002	501
pt_779175_780174	1	501	SRR9887262.655251	9457	9957	99.002	501
pt_779175_780174	1	501	SRR9887262.66290	3490	3990	99.002	501
pt_779175_780174	1	501	SRR9887262.72828	23274	23774	99.002	501
pt_779175_780174	1	501	SRR9887262.72828	44495	43995	99.002	501
pt_779175_780174	1	501	SRR9887262.78239	7574	7074	99.002	501
pt_779175_780174	1	501	SRR9887262.78253	9637	9138	98.802	501
pt_779175_780174	1	501	SRR9887262.83042	23803	24303	99.002	501
pt_779175_780174	1	501	SRR9887262.8519	3500	3006	97.405	501
pt_779175_780174	1	501	SRR9887262.90720	19107	18607	99.002	501
