# Supplementary material for: Deciphering the Multi-Chromosomal Mitochondrial Genome of Populus simonii
Source: Front Plant Sci. 2022 Jun 15;13:914635. doi: 10.3389/fpls.2022.914635 (PMC9240471; doi:10.3389/fpls.2022.914635)
Supplement: Supplementary file 6 [file Table_4.XLSX]

## Sheet: Table S4
Table S4. Gene composition and features of the P. simonii mitogenome
Group of genes	Gene Name	Length (bp)	Start codon	Stop codon
ATP synthase	atp1	1524	ATG	TAA
	atp4	597	ATG	TAG
	atp6	714	ATG	TAA
	atp8	474	ATG	TAG
	atp9	225	ATG	TAG
Cytochrome c biogenesis	ccmB	615	ATG	TGA
	ccmC	753	ATG	TGA
	ccmFca	1362	ATG	TAG
	ccmFn	1731	ATG	TGA
Ubichinol cytochrome c reductase	cob	1182	ATG	TGA
Cytochrome c oxidase	cox1	1584	ATG	TAA
	cox2	675	ATG	TAA
	cox3	798	ATG	TGA
Maturases	matR	1944	ATG	TAG
Transport membrane protein	mttB	786	ND	TAG
NADH dehydrogenase	nad1a	888	ATG	TAA
	nad2a	1461	ATG	TAA
	nad3	357	ATG	TAA
	nad4a	1488	ATG	TGA
	nad4L	303	ATG	TAA
	nad5a	2004	ATG	TAA
	nad6	630	ATG	TAG
	nad7a	1185	ATG	TAG
	nad9	573	ATG	TAA
Ribosomal proteins (LSU)	rpl2a	1008	ATG	TAA
	rpl10	489	ATG	TAA
	rpl16	417	ND	TAA
Ribosomal proteins (SSU)	rps1	636	ATG	TAA
	rps3a	1644	ATG	TAA
	rps4	969	ATG	TAA
	rps7	447	ATG	TAA
	rps12	378	ATG	TGA
Succinate dehydrogenase	sdh4	396	ATG	TAA
Ribosomal RNAs	rrn5	115
	rrnS	1912
	rrnL	3338
Transfer RNAs	trnC-GCA	71
	trnD-GUCb	74
	trnE-UUC	72
	trnfM-CAU	73
	trnF-GAA	72
	trnG-GCC	72
	trnH-GUGb	73
	trnH-AUG	70
	trnK-UUU	73
	trnM-CAU (×3)b	73
	trnN-GUUb	72
	trnP-UGG (×2)b	75
	trnQ-UUG	72
	trnS-GCU	88
	trnS-UGU	87
	trnS-GGAb	87
	trnW-CCAb	74
	trnY-GUA	83
aGenes containing introns.
bCp-derived genes.
ND: Start codon not determined.
