# Supplementary material for: Deciphering the Multi-Chromosomal Mitochondrial Genome of Populus simonii
Source: Front Plant Sci. 2022 Jun 15;13:914635. doi: 10.3389/fpls.2022.914635 (PMC9240471; doi:10.3389/fpls.2022.914635)
Supplement: Supplementary file 7 [file Table_5.XLSX]

## Sheet: Table S5
Table S5. The syntenic regions in each species comparing with P. tremula mitogenome.
Species	Genome size (bp)	Number of LCBs	Total syntenic sequences (bp)	Proportion of mitogenome (%)
vs P. simonii	781478	56	695519	89.0005
vs P. alba	838420	41	776825	92.6534
vs P. davidiana	779361	25	772408	99.1079
LCB: local colinear blocks.
