# Supplementary material for: Deciphering the Multi-Chromosomal Mitochondrial Genome of Populus simonii
Source: Front Plant Sci. 2022 Jun 15;13:914635. doi: 10.3389/fpls.2022.914635 (PMC9240471; doi:10.3389/fpls.2022.914635)
Supplement: Supplementary file 9 [file Table_7.XLSX]

## Sheet: Table S7
Table S7. Distribution of tandem repeats in the P. simonii mitogenome
Chromosome	Start	End	Repeat unit (bp)	Copy number	Percent matches (%)	Location
mtChr1	62151	62193	18	2.4	81	rrnL
mtChr1	81285	81352	33	2.1	88	IGS(atp1, trnM-CAU)
mtChr1	159641	159677	18	2.1	90	IGS(rps7, trnM-CAU)
mtChr1	168561	168586	13	2	100	IGS(trnM-CAU, cox2)
mtChr1	211250	211292	22	2	85	IGS(trnQ-UUG, ccmB)
mtChr1	233199	233246	25	1.9	86	IGS(ccmB, nad4L)
mtChr1	255551	255585	16	2.3	100	IGS(atp4, trnH-GUG)
mtChr2	28683	28730	24	2	87	IGS(rpl16, trnP-UGG)
mtChr2	55546	55597	21	2.5	87	IGS(trnE-UUC, nad1-exon1)
mtChr2	111026	111070	17	2.6	81	IGS(nad5-exon2, mttB)
mtChr2	122794	122844	25	2	92	IGS(mttB, cob)
mtChr2	189179	189219	20	2	100	IGS(cox1, rpl10)
mtChr3	55226	55264	19	2.1	85	IGS(trnS-GGA, ccmFc)
mtChr3	177213	177251	20	2	85	IGS(nad5-exon3, atp8)
IGS: Intergenic spaces
